# Supplementary material
Source: PubMed Central journal article supplement (PMC5563817)
Supplement: rspb20171269supp1.pdf [file rspb20171269supp1.pdf]

**Electronic supplementary material #1:**

1 *Novel host plant leads to the loss of sexual dimorphism in a sexually-selected male*  
2 *weapon*

Pablo E. Allen and Christine W. Miller  
Email: pabloallen@ufl.edu

The data in tables S1 and S2 was used to carry out the principal components analysis featured in figure 3.

**Table S1.** Person's correlation coefficient ( $r$ ) matrix for all measured traits; includes both sexes and treatments together. PW, pronotum width; HL, head length; BL, beak length; HFA, hind femur area; HTA, hind tibia area; FFL, front femur length. All pairwise correlations are statistically significant.  $N = 169$ .

|     | PW    | HL    | BL    | HFA   | HTA   | FFL |
|-----|-------|-------|-------|-------|-------|-----|
| PW  | 1     |       |       |       |       |     |
| HL  | 0.739 | 1     |       |       |       |     |
| BL  | 0.724 | 0.613 | 1     |       |       |     |
| HFA | 0.710 | 0.523 | 0.348 | 1     |       |     |
| HTA | 0.825 | 0.636 | 0.562 | 0.852 | 1     |     |
| FFL | 0.897 | 0.727 | 0.707 | 0.811 | 0.882 | 1   |

**Table S2.** Factor loadings by trait for the Principal Component analysis. Principal component 1 (PC1) explained 75.89% of the variance in the data with an eigenvalue of 4.554. Principal component 2 (PC 2) explained 12.49% of the variance in the data with an eigenvalue of 0.749.

| Trait | Component |       |
|-------|-----------|-------|
|       | PC 1      | PC 2  |
| PW    | 0.642     | 0.693 |
| HL    | 0.416     | 0.742 |
| BL    | 0.166     | 0.928 |
| HFA   | 0.959     | 0.168 |
| HTA   | 0.854     | 0.428 |
| FFL   | 0.745     | 0.618 |
