# Supplementary material
Source: PubMed Central journal article supplement (PMC5563817)
Supplement: rspb20171269supp2.pdf [file rspb20171269supp2.pdf]

## Electronic supplementary material #2:

*Novel host plant leads to the loss of sexual dimorphism in a sexually-selected male weapon*

Pablo E. Allen and Christine W. Miller

Email: pabloallen@ufl.edu

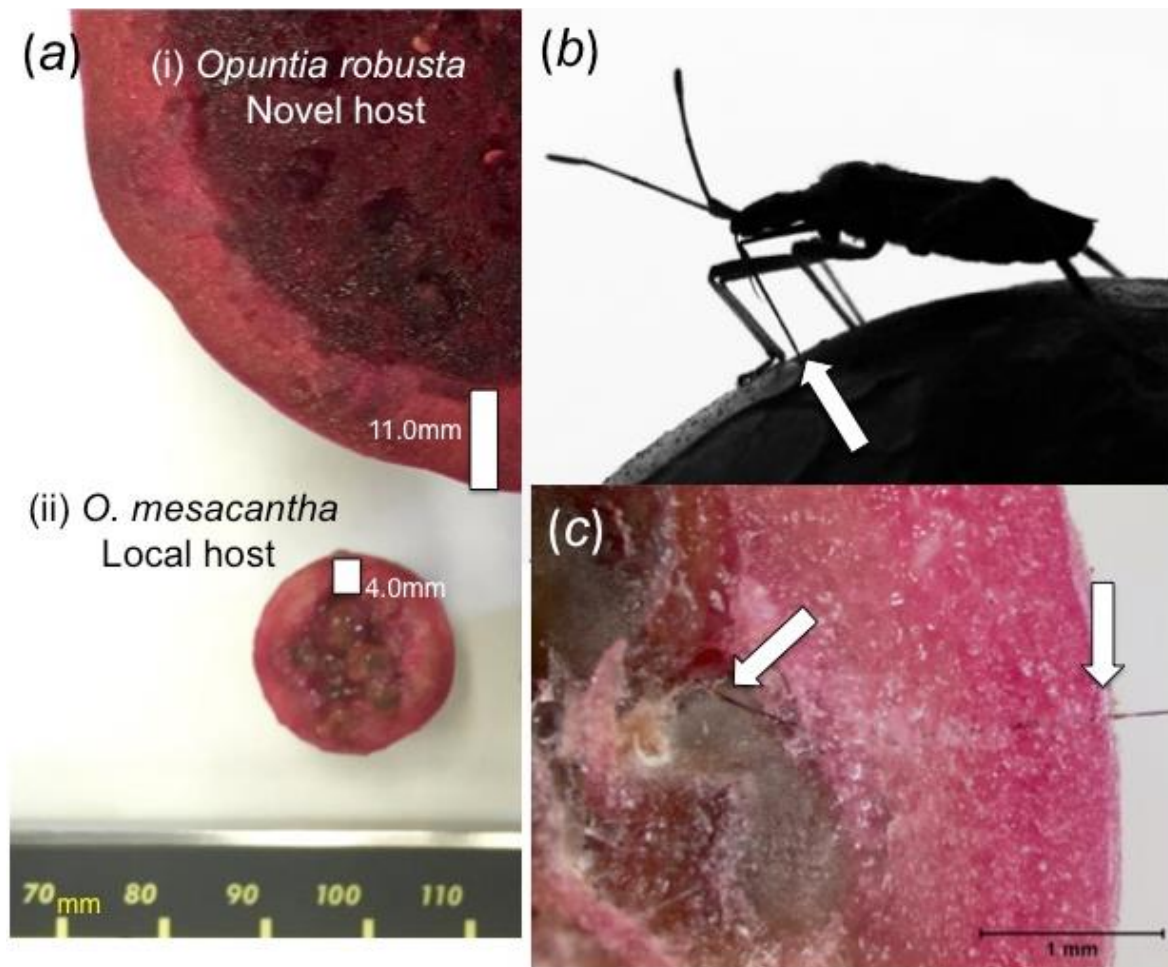

**Figure S1.** Host fruit comparisons and *Narnia femorata*. **(a)** Cross-sections of hosts: White bars illustrate the thickness of the fruit wall; the novel host has thicker walls. **(b)** *Narnia femorata* female inserting beak into fruit; arrow points at exposed beak. **(c)** Mouthparts inside local host fruit; beak can be seen reaching for pulp and seeds.

Photos: P. Allen, C.W. Miller, and L. Buss.

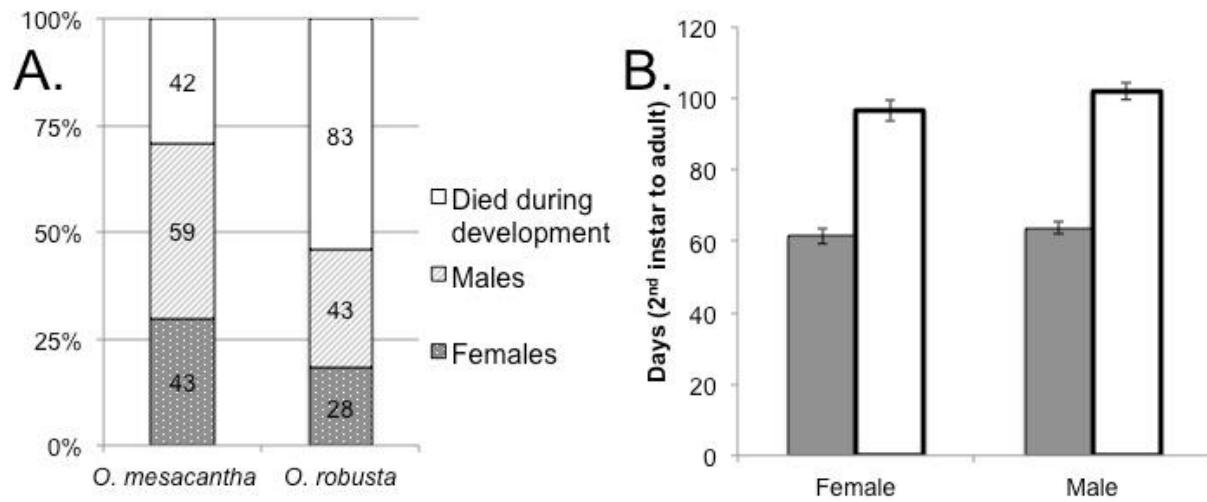

**Figure S2. A.** Survivorship to adulthood of *Narnia femorata* bugs on *Opuntia mesacantha* (local host) and *O. robusta* (novel host). **B.** Mean days ( $\pm$ SE) to adulthood from start of 2<sup>nd</sup> instar of *N. femorata* on *O. mesacantha* (grey bars) and *O. robusta* (white bars), separated by sex.
